# Supplementary material for: Analysis of Cyclic Imines in Mussels (Mytilus galloprovincialis) from Galicia (NW Spain) by LC-MS/MS
Source: PubMed Central journal article supplement (PMC6981759; doi:10.3390/ijerph17010281), 2019-12-31
Supplement: ijerph-17-00281-s001.pdf [file ijerph-17-00281-s001.pdf]

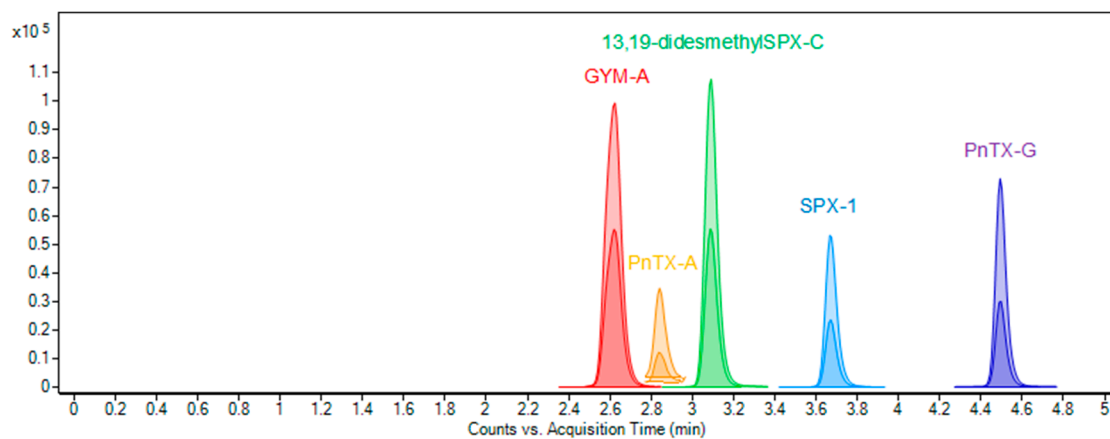

**Figure S1.** Representative dynamic multiple reaction monitoring (DMRM) chromatogram of CIs.

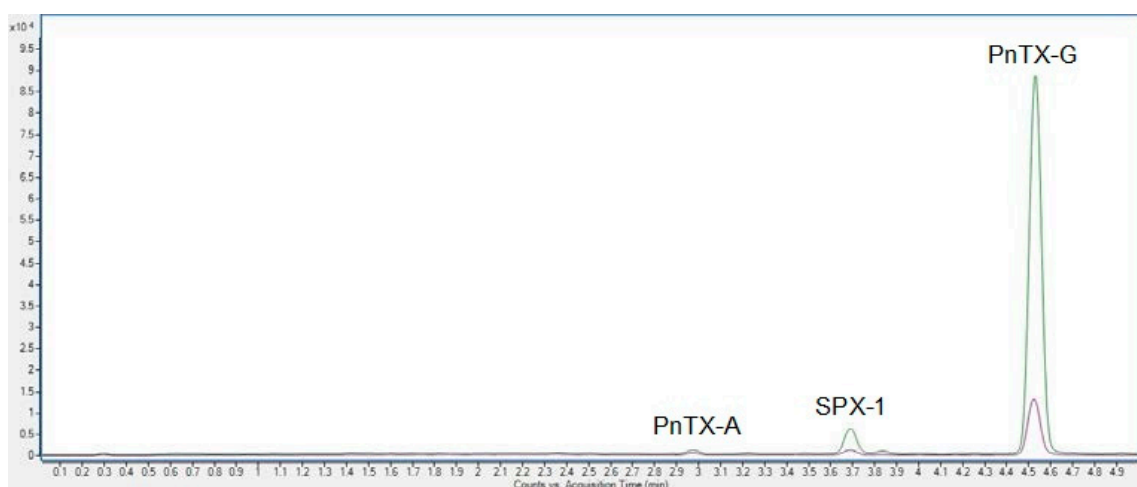

**Figure S2.** Overlapped total ion chromatogram (TIC) of sample RA3.4 before and after SPE.

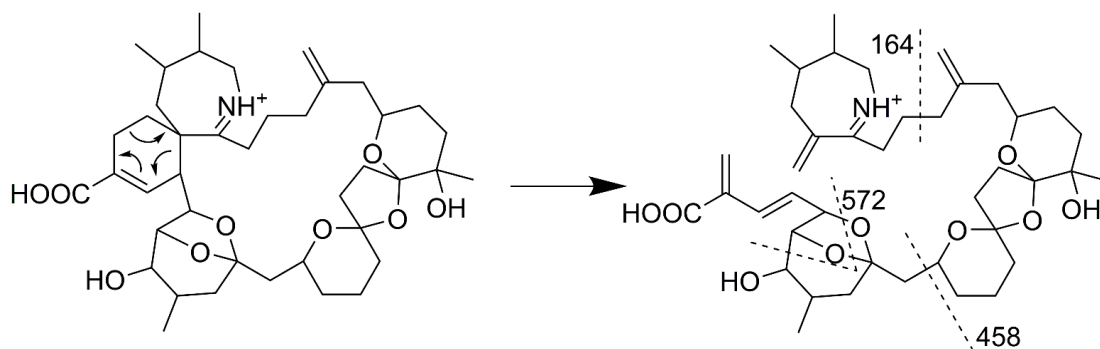

**Figure S3.** Structure of PnTX-A and fragment ions selected for multiple reaction monitoring (MRM) analysis.

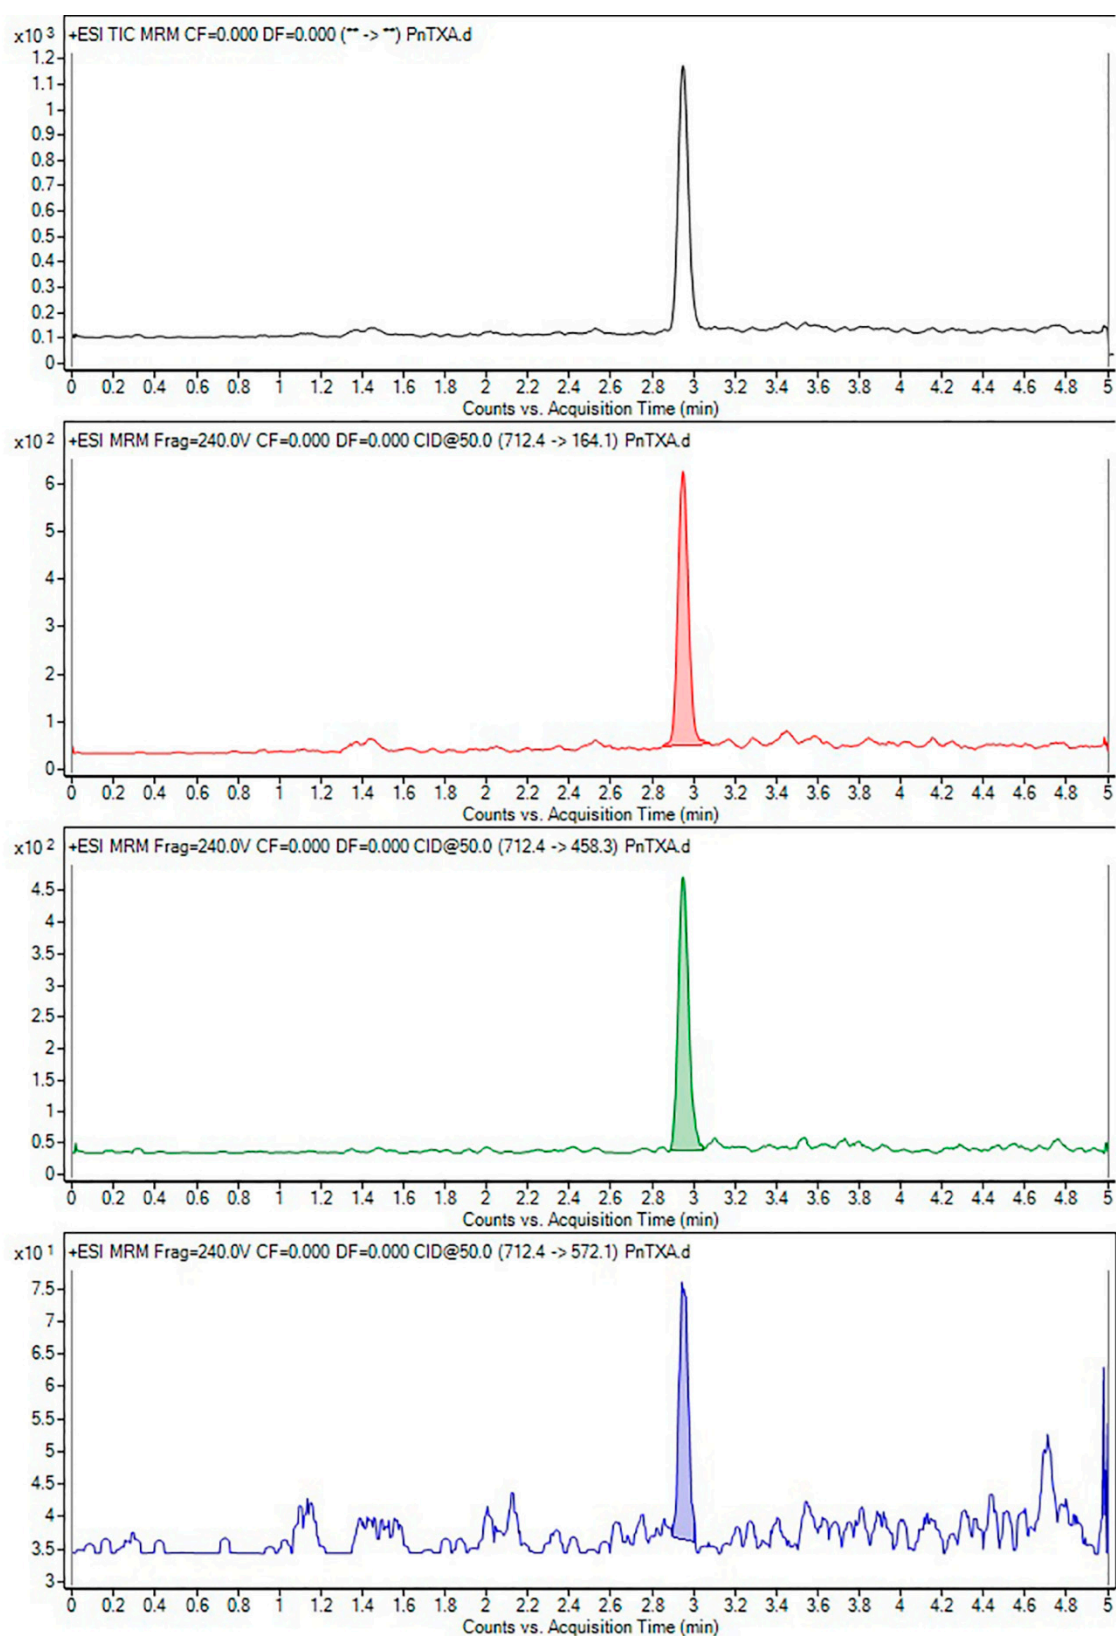

**Figure S4.** Multiple reaction monitoring (MRM) chromatograms for PnTX-A acquired on sample RA3.4 after SPE.
